# Supplementary material for: Supramolecular self-assembly with p-coumaric acid offers the first cocrystal for perfecting the physicochemical peculiarity and enhancing the antifungal effect of drug bifonazole
Source: Royal Society of Chemistry journal article supplement (doi:10.1039/d3ce00082f), 2023-01-01
Supplement: d3ce00082f1.pdf [file d3ce00082f1.pdf]

## Supplementary Information

**Supramolecular self-assembly with *p*-coumaric acid offers the first cocrystal for perfecting the physicochemical peculiarity and enhancing antifungal effect of drug bifonazole**

**Min Zhang,<sup>1,+</sup> Min-Yu Wang,<sup>1,+</sup> Yue-Ming Yu,<sup>1</sup> Su-Su Meng,<sup>1</sup> Cui-Wei Yan,<sup>\*,1</sup> Zhi-Yong Wu,<sup>\*,1,2</sup> and Yan-Tuan Li<sup>\*,1,2</sup>**

- 1. School of Medicine and Pharmacy, College of Marine Life Science, Ocean University of China, Qingdao, Shandong 266003, P.R. China.*
- 2. Laboratory for Marine Drugs and Bioproducts, Qingdao National Laboratory for Marine Science, Qingdao, Shandong, P.R. China.*

\*Corresponding authors

<sup>+</sup>These authors contributed equally to this work.

## Contents

### Supplementary figures

| Description                                                                                       | Page No. |
|---------------------------------------------------------------------------------------------------|----------|
| <b>Fig. S1</b> FT-IR spectra of BFZ, TPA and cocrystal BFZ-TPA.                                   | 3        |
| <b>Fig. S2</b> PXRD profiles of the simulated and experimental patterns for the remaining solids. | 3        |
| <b>Fig. S3</b> IDR profiles of BFZ and the cocrystal in different pH buffers.                     | 4        |

## Supplementary figures

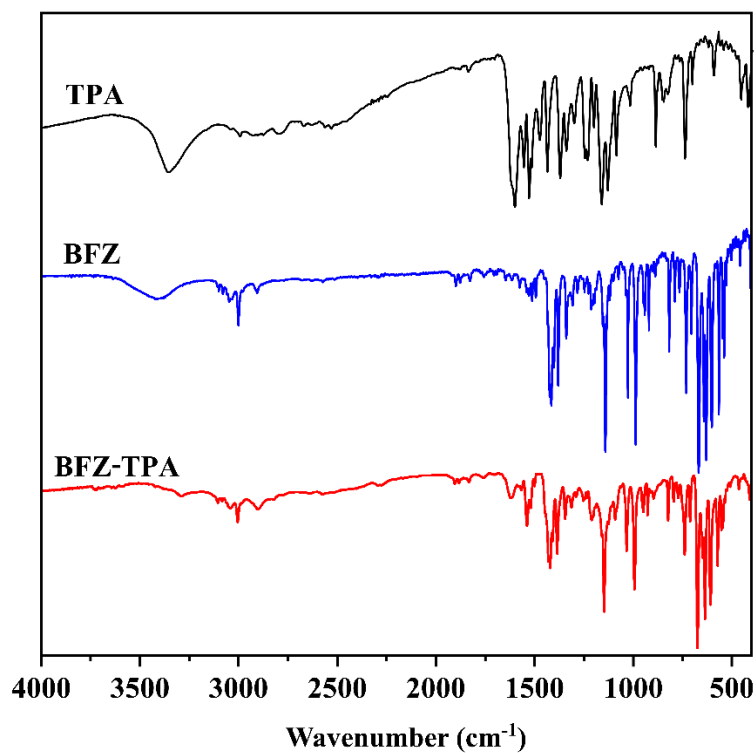

Fig. S1 FT-IR spectra of BFZ, TPA and cocrystal BFZ-TPA.

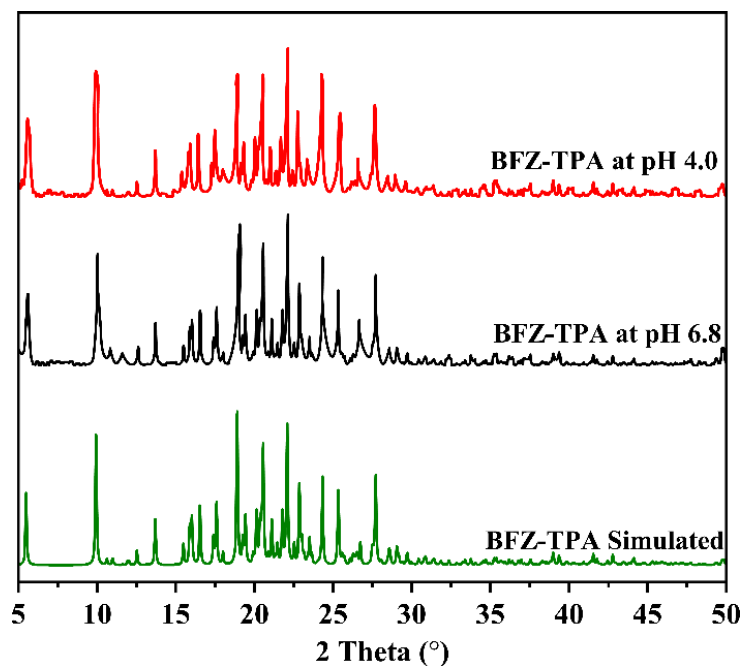

Fig. S2 PXRD profiles of the simulated and experimental patterns for the remaining solids.

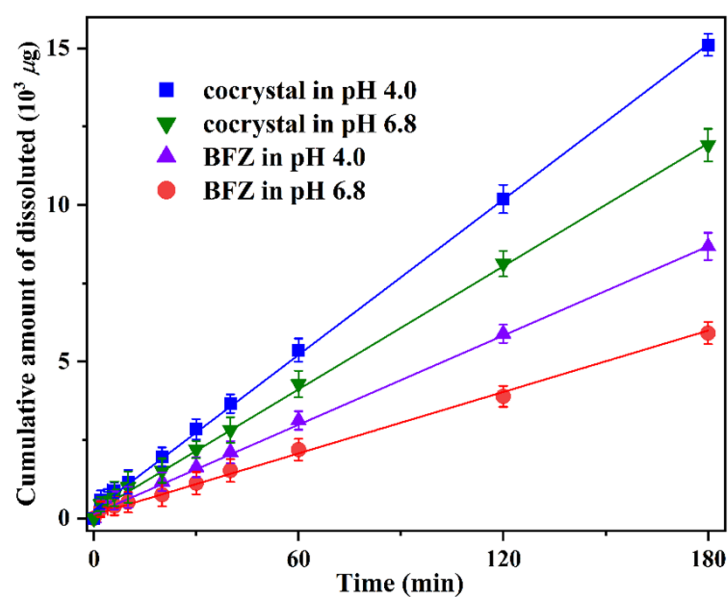

Fig. S3 IDR profiles of BFZ and the cocrystal in different pH buffers.
